# Supplementary material
Source: publisher figshare collection journal article supplement (https://acs.figshare.com/ndownloader/files/4052053)
Supplement: Supplementary file 1 [file 4052053]

# Highly efficient blue-green quantum dot light-emitting diodes using stable low-cadmium quaternary-alloy ZnCdSSe/ZnS core/shell nanocrystals

*Huaibin Shen<sup>a</sup>, Sheng Wang<sup>a</sup>, Hongzhe Wang<sup>a</sup>, Jinzhong Niu<sup>a</sup>,*

*Lei Qian<sup>a</sup>, Yixing Yang<sup>b</sup>, Alexandre Titov<sup>b</sup>, Jake*

*Hyvonen<sup>b</sup>, Ying Zheng<sup>b\*</sup>, and Lin Song Li<sup>a\*</sup>*

<sup>a</sup>Key Laboratory for Special Functional Materials, Henan University, Kaifeng 475004,  
P. R. China;

<sup>b</sup> NanoPhotonica Inc. 747 SW 2nd Ave. Gainesville, FL 32601, (USA)

E-mail: lsli@henu.edu.cn, ying.zheng@nanophotonica.com

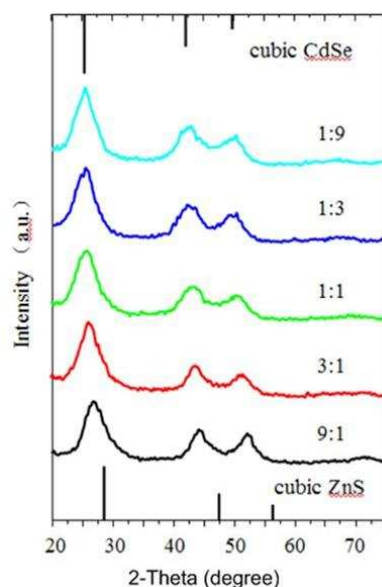

**Figure S1.** Powder XRD patterns of the  $\text{Zn}_{0.5}\text{Cd}_{0.5}\text{S}_{1-y}\text{Se}_y$  samples with different molar ratios of S and Se.

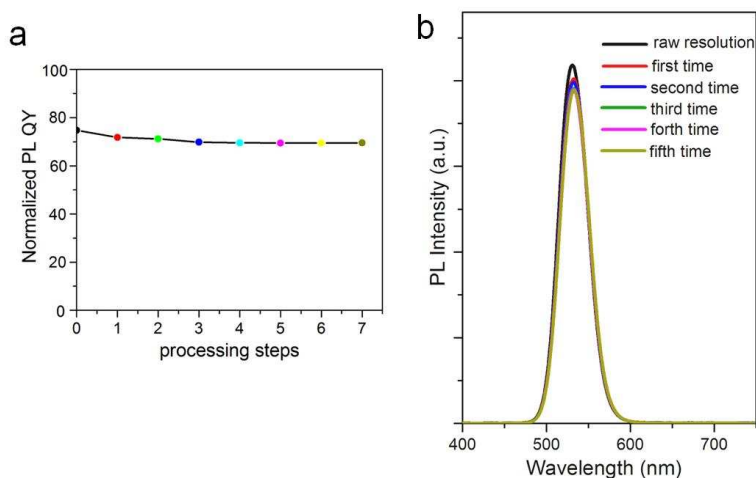

**Figure S2.** Evolution of the QYs (a) and PL (b) of  $\text{ZnCdSSe/ZnS}$  core/shell nanocrystals upon repeated purification process steps. Step 0: the raw nanocrystals resolution without any process. Steps 1-7: repeated precipitation of the nanocrystals and successive redispersion in hexanes.
